# Supplementary material for: A Critical Appraisal of the Quality of Glioma Imaging Guidelines Using the AGREE II Tool: A EuroAIM Initiative
Source: Front Oncol. 2019 Jun 7;9:472. doi: 10.3389/fonc.2019.00472 (PMC6566105; doi:10.3389/fonc.2019.00472)
Supplement: Supplementary file 1 [file Data_Sheet_1.xlsx]

## Sheet: Foglio1
Supplementary material. Detailed scores of each item for each domain assigned by the four appraisers.
	Domain 1				Domain 2				Domain 3									Domain 4				Domain 5					Domain 6
ELLINGSON	Item_1	Item_2	Item_3		Item_4	Item_5	Item_6		Item_7	Item_8	Item_9	Item_10	Item_11	Item_12	Item_13	Item_14		Item_15	Item_16	Item_17		Item_18	Item_19	Item_20	Item_21		Item_22	Item_23
Appraiser 1	6	6	4		7	3	4		2	2	2	5	4	5	6	2		6	5	4		4	4	3	6		5	5
Appraiser 2	6	6	6		7	4	5		2	3	2	5	4	6	6	2		6	4	2		3	5	3	5		4	6
Appraiser 3	7	7	5		7	4	5		2	2	2	5	4	5	6	1		6	6	6		3	5	3	5		5	5
Appraiser 4	7	5	6		7	6	5		5	4	4	5	4	4	5	2		6	6	5		6	4	2	3		4	1
ESSIG	Item_1	Item_2	Item_3		Item_4	Item_5	Item_6		Item_7	Item_8	Item_9	Item_10	Item_11	Item_12	Item_13	Item_14		Item_15	Item_16	Item_17		Item_18	Item_19	Item_20	Item_21		Item_22	Item_23
Appraiser 1	5	6	5		7	3	3		1	1	3	2	4	5	7	1		6	6	6		3	4	2	4		2	5
Appraiser 2	4	6	5		7	3	4		2	1	2	2	3	6	6	1		6	6	7		3	5	2	6		3	5
Appraiser 3	5	6	6		7	4	4		2	1	3	2	4	6	6	1		6	6	7		2	4	3	5		3	5
Appraiser 4	7	5	6		7	2	5		3	3	2	5	3	4	5	2		6	4	7		3	4	2	6		1	1
BYRNE	Item_1	Item_2	Item_3		Item_4	Item_5	Item_6		Item_7	Item_8	Item_9	Item_10	Item_11	Item_12	Item_13	Item_14		Item_15	Item_16	Item_17		Item_18	Item_19	Item_20	Item_21		Item_22	Item_23
Appraiser 1	4	5	5		1	3	3		2	1	2	1	4	1	1	2		5	4	5		2	1	2	5		6	2
Appraiser 2	3	2	3		2	3	3		2	2	3	3	4	2	1	5		5	4	5		3	3	2	5		6	2
Appraiser 3	5	5	6		1	2	4		2	1	2	2	4	2	1	1		6	5	6		3	2	3	5		6	1
Appraiser 4	6	5	6		2	2	4		2	2	2	2	4	2	4	2		5	4	5		3	4	2	2		2	1
THUST	Item_1	Item_2	Item_3		Item_4	Item_5	Item_6		Item_7	Item_8	Item_9	Item_10	Item_11	Item_12	Item_13	Item_14		Item_15	Item_16	Item_17		Item_18	Item_19	Item_20	Item_21		Item_22	Item_23
Appraiser 1	6	6	4		5	3	5		6	5	6	6	2	5	6	2		6	6	6		6	6	2	4		5	7
Appraiser 2	6	7	5		6	2	5		7	5	6	6	4	6	6	1		6	6	7		7	6	3	4		5	7
Appraiser 3	7	7	5		5	2	5		7	4	5	6	4	5	6	1		7	7	6		7	5	1	4		5	6
Appraiser 4	7	5	6		3	3	5		5	4	6	6	4	6	5	2		6	6	6		5	3	2	2		4	7
FOUKE	Item_1	Item_2	Item_3		Item_4	Item_5	Item_6		Item_7	Item_8	Item_9	Item_10	Item_11	Item_12	Item_13	Item_14		Item_15	Item_16	Item_17		Item_18	Item_19	Item_20	Item_21		Item_22	Item_23
Appraiser 1	7	7	7		4	2	5		6	7	7	4	3	6	5	3		7	6	7		3	3	2	1		4	5
Appraiser 2	6	6	7		5	4	5		6	6	5	6	4	6	7	6		6	6	5		4	5	2	4		7	7
Appraiser 3	7	7	7		5	3	4		7	6	7	7	4	6	6	5		6	6	7		3	5	2	5		7	7
Appraiser 4	7	7	7		5	4	5		7	7	7	5	4	5	5	2		7	6	7		4	4	3	3		5	7
MUKUNDAN	Item_1	Item_2	Item_3		Item_4	Item_5	Item_6		Item_7	Item_8	Item_9	Item_10	Item_11	Item_12	Item_13	Item_14		Item_15	Item_16	Item_17		Item_18	Item_19	Item_20	Item_21		Item_22	Item_23
Appraiser 1	6	6	6		2	2	5		6	7	7	4	3	6	5	3		6	5	7		3	3	2	1		2	2
Appraiser 2	5	5	6		5	4	6		7	6	5	6	4	6	6	5		5	4	5		4	4	4	2		5	5
Appraiser 3	6	5	5		4	3	5		7	6	5	6	4	5	6	5		5	5	5		3	3	4	3		4	4
Appraiser 4	7	6	7		3	2	5		7	7	7	5	4	4	5	2		6	3	7		3	3	2	2		2	2
RYKEN	Item_1	Item_2	Item_3		Item_4	Item_5	Item_6		Item_7	Item_8	Item_9	Item_10	Item_11	Item_12	Item_13	Item_14		Item_15	Item_16	Item_17		Item_18	Item_19	Item_20	Item_21		Item_22	Item_23
Appraiser 1	6	7	7		4	2	5		6	7	7	6	3	7	5	3		7	6	7		2	2	2	1		4	4
Appraiser 2	6	6	7		6	4	5		7	6	4	6	5	6	6	5		6	3	5		2	3	2	3		6	7
Appraiser 3	6	6	6		5	3	5		7	6	5	6	4	5	6	5		5	5	5		3	3	3	2		7	6
Appraiser 4	7	7	7		4	2	5		7	7	4	5	4	5	5	3		7	4	7		3	4	3	4		6	7
